# Supplementary material for: Realised genetic gain and predictive ability across breeding cycles for cooking time in common bean based on multivariate genomic selection
Source: Research Square preprint supplement (doi:10.21203/rs.3.rs-8256298/v1), 2025-12-18
Supplement: Supplementary file 1 [file 894abf2bc7a066b7b248ca9d.xlsx]

## Sheet: Online Resource 1
Founder parents (Cycle 1A)					Founder parents (Cycle 1B)						Benchmark varieties				Local check varieties
Genotype ID		Genotype Name	heterozygosity (%)		Genotype ID			Genotype Name	heterozygosity (%)		Genotype ID		Genotype Name		Genotype ID		Genotype Name	Country
7121		A222	0.0882189		119427			ACC10	0.00223339		1286		AWASH1		68823		AND10	Burundi
2720		A286	0.00670017		113914			ALB152	0.0195422		4028		DOR500		200357		MUHORO	Burundi
679		AB136	0.0100503		113941			ALB179	0.0184255		54141		NABE12C		200366		Jaune volubile	Burundi
113768		ALB6	0.0217755		113958			ALB196	0.0161921		70483		CAL96		123707		MAC70	Burundi
31470		AMENDOIN	0.0150754		113768	*		ALB6	0.0217755		77164		MIB465		200362		Kinure	Burundi
212826		AND277	0.0457845		212825			AND10-KW	0.00111669		77291		SER125		200356		RWV1272	Burundi
3902		AND279			114256			BFS14	0.00558347		80541		SAB712		4387		G21715	Burundi
121045		AWASHMELKA	0.646566		114269			BFS27	0.00558347		113525		KATB1		207159		BCB11404	Burundi
70408		CAB2	0.0519263		70408	*		CAB2	0.0519263		114354		SCN11		200325		BCB-11-315	Burundi
121074		CANPSULA			2949			CAL123	0.00111669		114381		NAROBEAN 6		200321		IZO2015110	Burundi
173085		CMKN 1109	0.00558347		194383			CMKFS 10	0.0301508		119863		MAC44		173848		KATX69	Burundi
173134		CMKN 1551	0.00390843		194480			CMKFS 107	0.00614182		121040		JESCA		173860		RWR 1092	Burundi
173165		CMKN 1810	0.384701		194483			CMKFS 110	0.0134003		121043		RWR2154		200322		RWR2091	Burundi
172995		CMKN 189			194487			CMKFS 114	0.00781686		121069		RWR2245		173852		MUSENGO	Burundi
173179		CMKN 1953	0.0161921		194494			CMKFS 121	0.00558347						200323		CODMLB003	Burundi
173000		CMKN 370			194495			CMKFS 122	0.00558347						200327		Awash 2	Ethiopia
173001		CMKN 491	0.103294		194504			CMKFS 131	0.00781686						77285		SER119	Ethiopia
173009		CMKN 604			194505			CMKFS 132							252020		Gorossa	Ethiopia
173010		CMKN 606	0.025684		194506			CMKFS 133							122818		DAB96	Ethiopia
173012		CMKN 641			194507			CMKFS 134							252022		Kello	Ethiopia
173025		CMKN 748			194508			CMKFS 135							122953		DAB372	Ethiopia
173036		CMKN 829	0.00167504		194510			CMKFS 137	0.00558347						200341		KK 15	Kenya
173045		CMKN 867	0.00837521		194511			CMKFS 138	0.0714685						173836		KK 8	Kenya
173831		CNF 5520			194387			CMKFS 14	0.0111669						70445		CAL33	Kenya
238		CORNELL49-242	0.027359		194513			CMKFS 140	0.00614182						213988		CAL194	Kenya
119587		DAB302	0.025684		194392			CMKFS 19	0.00502513						213987		Red 13	Kenya
119630		DAB366	0.0122836		194375			CMKFS 2							213986		Red 16	Kenya
115027		DAB441	0.0094919		194400			CMKFS 27	0.0357342						124427		MBC21	Rwanda
171474		DON TIMOTEO	0.0709101		194404			CMKFS 31	0.00614182						146167		RWV2350A-2B	Rwanda
212828		DRK64-KW			194405			CMKFS 32	0.00335008						146168		RWCB 191	Rwanda
212829		FEB192-KW			194410			CMKFS 37							213989		RWR 3194	Rwanda
365		FLORDEMAYO			194411			CMKFS 38	0.0240089						126449		NUA566	Rwanda
3079		G21212	0.233389		194412			CMKFS 39	0.00614182						146166		RWBB 185	Rwanda
99		G2333	0.0586265		194421			CMKFS 48	0.0826354						192437		Njano Uyole	Tanzania
527		G5686	0.0161921		194426			CMKFS 53	0.00502513						200231		NAROBEAN 4C	Uganda
173893		GLORIA			194431			CMKFS 58	0.214964						224985		NAROBEAN5C	Uganda
1103		GLP2	0.302624		194432			CMKFS 59	0.00446678
121040		JESCA			194438			CMKFS 65	0.0094919
121041		KANYEBWA	0.0122836		194440			CMKFS 67	0.0094919
192490		KATRAM -01	0.0178671		194441			CMKFS 68	0.00502513
171535		KWP 9	0.0268007		194443			CMKFS 70	0.00446678
212830		LSA32-KW	0.00670017		194446			CMKFS 73
173866		M’sole			194452			CMKFS 79	0.00725851
119862		MAC42			194453			CMKFS 80	0.00558347
119863		MAC44			194454			CMKFS 81
171317		MALAWI GREEN			194456			CMKFS 83	0.00781686
171260		Masindi yellow long	0.0463428		194457			CMKFS 84
119904		MAZ203	0.0720268		194458			CMKFS 85
11968		MCM2001	0.0335008		194459			CMKFS 86
9028		MCM5001	0.0234506		194461			CMKFS 88	0.0094919
75261		MEX54			194462			CMKFS 89	0.00670017
76787		MEXICO222	0.0290341		173085	*		CMKN 1109	0.00558347
77164		MIB465	0.0569514		173134	*		CMKN 1551	0.00390843
121058		MLB-49-89A	0.129537		173165	*		CMKN 1810	0.384701
2360		MONTCALM	0.00837521		173179	*		CMKN 1953	0.0161921
54141		NABE12C			173009	*		CMKN 604
173859		NAKAJA			173025	*		CMKN 748
121064		NASIR	0.100503		173036	*		CMKN 829	0.00167504
207746		NATAL SUGAR			173045	*		CMKN 867	0.00837521
76885		NCB226	0.00446678		173052			CMKN 898	0.00279174
120205		NUA515			238	*		CORNELL49-242	0.027359
120095		NUA99			121049			DECELAYA	0.0111669
173782		NUAK 399			3079	*		G21212	0.233389
173829		NUAK 512			1103	*		GLP2	0.302624
212831		PAN150-KW	0.0139587		172271			KFRR 274	0.00446678
17599		PAN72	0.0094919		171562			KWP 69	0.00279174
16468		PERRYMARROW	0.0100503		172403			Mexico 142
73557		RAZ11	0.0329425		121068			NABE 14	0.00335008
120654		RAZ120	0.00781686		76885	*		NCB226	0.00446678
73584		RAZ19			212831	*		PAN150-KW	0.0139587
173838		ROBA-1			1001			PI207262	0.00725851
173840		RWR 362			120654	*		RAZ120	0.00781686
121043		RWR2154			121069	*		RWR2245	0.00223339
121069		RWR2245	0.00223339		177095			RWV 2070	0.00446678
173876		RWV 3316			121071	*		RWV1129	0.0150754
121071		RWV1129	0.0150754		80542	*		SAB713	0.294807
173212		RWV3006			114364			SCR9	0.00446678
80542		SAB713	0.294807		74719			SEA15	0.00335008
173861		SCAM-80 CM/15	0.0189838		77248	*		SER82	0.0100503
77294		SER128	0.0457845		118644	*		SMC28	0.00558347
75999		SER30			172594			SSIN 1064	0.00390843
77214		SER48	0.0307091		172606			SSIN 1116	0.00614182
77248		SER82	0.0100503		172632			SSIN 1240	0.00502513
118644		SMC28	0.00558347		172682			SSIN 52	0.00446678
92142		TWUNGURUMIRWANGO			172825			SSIN 527	0.00446678
173863		URUGEZI (1378/4)	0.0167504		172704			SSIN 533	0.00558347
3076		VAX1	0.012842		172717			SSIN 755	0.00390843
13563		VAX2	0.0117253		121073			UBR(92)25	0.00725851
30946		VAX5
76785		WIDUSA	0.065885
212832		XAN76-KW

## Sheet: Online Resource 2
																									#VALUE!
#VALUE!

## Sheet: Online Resource 3
	Pedigree								Genomic								Single-step
	Additive genetic effect				Residual effect				Additive genetic effect				Residual effect				Additive genetic effect				Residual effect
Trait	VC	SE	Z-ratio		VC	SE	Z-ratio		VC	SE	Z-ratio		VC	SE	Z-ratio		VC	SE	Z-ratio		VC	SE	Z-ratio
CKT	592.462	49.0927	12.0682		608.676	19.122	31.8312		148.04	23.1186	6.40351		775.912	17.3428	44.7397		548.06	64.7435	8.4651		728.34	17.4312	41.7837
Fe	60.1831	6.42205	9.37133		119.826	3.42511	34.9845		59.9573	7.25301	8.26654		131.815	3.07421	42.8777		139.365	13.5495	10.2856		121.103	2.98306	40.597
Zn	9.04566	0.893544	10.1234		13.8223	0.418491	33.0289		17.1177	1.64406	10.4119		15.5633	0.36448	42.7001		38.1919	2.81455	13.5695		14.6654	0.360951	40.6298
SW100	19.4095	1.3779	14.0863		15.0595	0.488073	30.855		386.962	42.8731	9.02576		17.6697	0.419137	42.1573		877.486	77.6366	11.3025		15.4182	0.388736	39.6624
WAC	636.359	45.2599	14.0601		451.538	15.1336	29.8368		8.30004	0.952179	8.7169		599.516	14.1168	42.4684		17.5995	1.66696	10.5578		546.253	13.6415	40.0433

## Sheet: Online Resource 4
		Pedigree				Genomic				Single-step
Population	Traits	t-statistic	SE	p value		t-statistic	SE	p value		t-statistic	SE	p value
A	CKT	24.8665	0.57191	2.77246e-115		23.5334	0.376415	6.16276e-105		24.9703	0.40579	7.2716e-118
	Fe	19.5593	0.238199	1.55193e-77		15.3787	0.234915	1.06191e-49		18.0925	0.251702	3.30426e-67
	Zn	15.815	0.0835786	7.28753e-53		12.0709	0.0824795	4.07787e-32		14.4938	0.0847334	4.14852e-45
	SW100	11.8091	0.191665	4.16742e-31		13.383	0.200626	8.74903e-39		12.3889	0.196963	6.14859e-34
	WAC	-13.1251	0.623696	1.30028e-37		-14.5329	0.472727	2.89906e-45		-14.6389	0.514229	4.32546e-46
B	CKT	54.861	0.540022	0		40.7673	0.447062	1.93426e-253		48.7493	0.449956	0
	Fe	-0.962129	0.227453	0.336119		-1.85283	0.253605	0.0640782		-1.15934	0.249106	0.246469
	Zn	13.608	0.0805968	3.51679e-40		11.0824	0.0891972	1.29841e-27		11.8832	0.0845725	2.05867e-31
	SW100	14.2976	0.142089	5.97077e-44		14.0748	0.155742	1.1395e-42		13.6623	0.153087	1.76037e-40
	WAC	-48.1757	0.552272	0		-40.7365	0.538595	1.89945e-260		-42.4256	0.544895	3.17209e-275

## Sheet: Online Resource 5
		Pedigree				Genomic				Single-step
Trait1	Trait2	Correlation	std.error	z.ratio		Correlation	std.error	z.ratio		Correlation	std.error	z.ratio
CKT	Fe	0.434417	0.0590576	7.35581		0.256131	0.0930105	2.75379		0.257861	0.0719162	3.58558
CKT	Zn	0.316483	0.0607831	5.20676		0.282596	0.0904647	3.12383		0.193768	0.0728276	2.66065
CKT	SW100	0.0121414	0.0534181	0.22729		-0.208257	0.0848896	-2.45326		-0.0541549	0.0648452	-0.835141
CKT	WAC	-0.892601	0.0196835	-45.3476		-0.767891	0.0496299	-15.4724		-0.728156	0.0419649	-17.3515
Fe	Zn	0.736117	0.0350257	21.0165		0.733282	0.0393111	18.6533		0.681974	0.0359514	18.9693
Fe	SW100	-0.240549	0.0600408	-4.00643		-0.22418	0.073271	-3.0596		-0.212645	0.0573449	-3.70817
Fe	WAC	-0.395546	0.0583197	-6.78238		-0.295181	0.0759684	-3.88558		-0.314448	0.0601856	-5.22463
Zn	SW100	-0.196812	0.0584041	-3.36983		-0.166493	0.07292	-2.28323		-0.0911466	0.0586859	-1.55312
Zn	WAC	-0.26736	0.059183	-4.51751		-0.352245	0.0718911	-4.8997		-0.320123	0.0599525	-5.33961
SW100	WAC	0.128539	0.0504017	2.55029		0.172075	0.0722886	2.38039		0.0615141	0.0569015	1.08106
